# Supplementary material for: Sponges of Western Mediterranean seamounts: new genera, new species and new records
Source: PeerJ. 2021 Aug 26;9:e11879. doi: 10.7717/peerj.11879 (PMC8403479; doi:10.7717/peerj.11879)
Supplement: Supplemental Information 1 [file peerj-09-11879-s001.xlsx]

## Sheet: GENBANK ID
Species	Genbank ID's	Author collection code	CFM-IEOMA Code
COI
Agelas cerebrum	DQ075692
Agelas cervicornis	DQ075753
Agelas citrina	MH285788
Agelas citrina	MH285789				List of sequences used in this study by alphabetical order.
Agelas citrina	MH285787
Agelas citrina	MH285786
Agelas clathrodes	DQ075740
Agelas clathrodes	DQ075743
Agelas clathrodes	DQ075719
Agelas conifera	DQ075699
Agelas conifera	DQ075712
Agelas dilatata	DQ075693
Agelas dispar	DQ075710
Agelas dispar	DQ075715
Agelas dispar	DQ075736
Agelas dispar	DQ075707
Agelas gracilis	DQ069300
Agelas mauritania	DQ069302
Agelas nemoechinata	DQ069306
Agelas novacaledoniae	DQ069301
Agelas oroides	LN868208
Agelas repens	DQ075756
Agelas sceptrum	DQ075739
Agelas schmidti	DQ075711
Agelas sp.	MK833917
Agelas sp.	MK503382
Agelas sventres	DQ075746
Agelas sventres	DQ075695
Agelas sventres	DQ075731
Agelas sventres	MH285799
Agelas sventres	MH285794
Agelas sventres	MH285790
Agelas sventres	MH285785
Agelas sventres	DQ075772
Agelas sventres	MH285798
Agelas sventres	MH285797
Agelas sventres	MH285792
Agelas sventres	MH285791
Astrosclera willeyana	AY561969
Axinella arctica	MK570860
Axinella aruensis	JQ034547
Axinella aruensis	JQ034548
Axinella aruensis	JQ034549
Axinella aruensis	JQ034550
Axinella aruensis	JQ034551
Axinella cannabina	KX866735
Axinella corrugata	AY791693
Axinella polypoides	LN868209
Biemna fistulosa	MT586737
Biemna fistulosa	KY565306
Biemna fistulosa	AM076982
Biemna fistulosa	KU060567
Biemna fistulosa	KU060563
Biemna megalosigma var. Sigmodragma	MT491474
Biemna megalosigma var. Sigmodragma	MT491471
Biemna megalosigma var. Sigmodragma	MT491470
Biemna megalosigma var. Sigmodragma	MT491468
Biemna saucia	JF773146
Biemna sp.	MT491478
Biemna sp.	MT491477
Biemna sp4	MT491479
Biemna sp4	MT491472
Biemna sp4	MT491467
Biemna variantia	HQ379424
Calyx cf. tufa	MW858349	i525	7403
Ceratoporella nicholsoni	DQ075747
Ceratoporella nicholsoni	DQ075775
Cinachyra sp.	KX454495
Cymbaxinella verrucosa	LN868210
Eurypon cf. clavatum	AJ843893
Heteroxya cf. beauforti	MW858350	i726	7380
Hymerhabdia typica	KC869425
Neofibularia hartmani	JF773145
Neofibularia hartmani	MH784610
Neofibularia hartmani	HE611587
Neofibularia hartmani	JQ034574
Neofibularia irata	HE611588
Neofibularia irata	JQ034576
Neofibularia nolitangere	EF519653
Paratimea massutii sp. nov. (Holotype)	MW858351	i403	7383
Prosuberites laughlini	AY561960
Foraminospongia balearica sp. nov. (Holotype)	MW858346	i802	7356
Foraminospongia balearica sp. nov. (Paratype)	MW858347	i293_1	7358
Foraminospongia minuta sp. nov. (Holotype)	MW858348	i439	7362
Rhabderemia sorokinae	HE611607
Rhabderemia sp1	MZ570433	i729_1	7415
Sigmaxinella hipposiderus	JF773147
Sigmaxinella sp1	MT491533
Sigmaxinella sp1	MT491535
Sigmaxinella sp1	MT491532
Sigmaxinella sp2	MT491534
Sigmaxinella sp2	MT491531
Stylissa carteri	MK833941
Stylissa carteri	KY263266
Stylissa carteri	KY263105
Stylissa carteri	KY262960
Stylissa carteri	JQ034580
Stylissa carteri	JQ034581
Stylissa carteri	MK833942
Stylissa massa	JQ034582
Stylissa massa	JQ034583
Suberites domuncula	JX999078
Suberites ficus	HQ379429
28S
Acanthostylotella cornuta	KC869600
Agelas clathrodes	AY864739
Agelas conifera	KC869634
Agelas conifera	AY864738
Agelas dispar	AY864740
Agelas oroides	KX688750
Agelas oroides	KX688753
Agelas sp.	AY561929
Astrosclera willeyana	KC869525
Axinella corrugata	KC869523
Axinella corrugata	KC869458
Axinella damicornis	AF062605
Axinella damicornis	KX688743
Axinella damicornis	GQ466058
Axinella damicornis	HQ379198
Axinella damicornis	KX688749
Axinella verrucosa	GQ466063
Biemna fistulosa	MT452534
Biemna variantia	HQ379224
Calyx cf. tufa	MW881149	i525	7403
Cymbastela cantharella	GQ466064
Heteroxya cf. beauforti	MW881150	i726	7380
Hymerhabdia typica	HQ379289
Hymerhabdia typica	HQ379398
Hymerhabdia typica	HQ379357
Hymerhabdia typica	HQ379223
Prosuberites laughlini	AY626320
Prosuberites longispinus	HQ379245
Foraminospongia balearica sp. ov (Holotype)	MW881153	i802	7356
Foraminospongia minuta sp. nov. (Holotype)	MW881151	i439	7362
Rhabderemia acanthostyla	MN386047
Rhabderemia indica	MK372889
Sigmaxinella sp	KC869491
Stylissa carteri	KU060553
Stylissa carteri	KU060402
Stylissa carteri	KU060396
Stylissa carteri	AY618720
Stylissa carteri	AY618718
Stylissa carteri	AY618719
Stylissa massa	AY618722
Stylissa massa	AY618721
Suberites domuncula	AJ620113
Suberites ficus	HQ379247

## Sheet: MUSEUM CODES
Species	Author collection code	CFM-IEOMA Code	Observaciones
Foraminospongia balearica	i802	7356	Bushy-tubular fragment	Specimens were deposited in the Marine Fauna Collection (http://www.ma.ieo.es/cfm/) based at the Centro Oceanográfico de Málaga (Instituto Español de Oceanografía)
Foraminospongia balearica	i144	7357	Bushy-tubular fragment
Foraminospongia balearica	i293_1	7358	Bushy-tubular fragment
Foraminospongia balearica	i239	7359	Bushy-tubular fragment
Foraminospongia balearica	i745	7360	Bushy-tubular fragment
Foraminospongia balearica	i824_4	7361	Bushy-tubular fragment
Foraminospongia minuta	i439	7362	Small encrusting
Foraminospongia minuta	i474	7363	Small encrusting
Axinella spatula	i338_A	7364	Small erect
Axinella spatula	i338_B	7365	Small erect
Axinella spatula	i338_C	7366	Small erect
Phakellia robusta	i347_2	7367	Small, fan shaped, 1 cm2
Phakellia robusta	i405	7368	Small, fan shaped, 1 cm2
Phakellia robusta	i409	7369	Small, fan shaped, 1 cm2
Phakellia robusta	i414_2	7370	Small, fan shaped, 1 cm2
Phakellia robusta	i417	7371	Small, fan shaped, 1 cm2
Phakellia robusta	i712	7372	Small, fan shaped, 1 cm2
Phakellia robusta	i731	7373	Small, fan shaped, 2 cm2
Phakellia robusta	POR760	7374	Small, fan shaped, 3 cm2
Phakellia robusta	POR762	7375	Small, fan shaped, 3 cm2
Phakellia ventilabra	i822_1	7376	Small, fan shaped, 3 cm2
Phakellia hirondellei	i353	7377	Small, fan shaped, 3 cm2
Phakellia hirondellei	i623	7378	Small, fan shaped, 3 cm2
Heteroxya cf. beauforti	i727	7379	Small encrusting and circular
Heteroxya cf. beauforti	i726	7380	Small encrusting and circular
Heteroxya cf. beauforti	i444	7381	Small encrusting and circular
Heteroxya cf. beauforti	i461	7382	Small encrusting and circular
Heteroxya cf. beauforti	i487	7450	Small encrusting and circular
Paratimea massutii sp nov	i403	7383	Massive fragment 4 cm in diameter
Paratimea massutii sp nov	i420	7384	Spicule preparation
Rhabdobaris implicata	i338_2	7385	Small, fan shaped, 1 cm2
Rhabdobaris implicata	i698	7386	Small, fan shaped, 1 cm2
Dragmatella aberrans	i52_b1	7387	Small encrusting fragment with papillae
Dragmatella aberrans	i175	7388	Small encrusting fragment with papillae
Haliclona (Soestella) fimbiata	i825_1	7389	Erect, 2 cm2
Petrosia (Strongylophora) vansoesti	i192_A	7390	Massive fragment 3-4 cm3
Petrosia (Strongylophora) vansoesti	i192_B	7391	Massive fragment 3-4 cm3
Petrosia (Strongylophora) vansoesti	i313_P	7392	Massive fragment 3-4 cm3
Petrosia (Strongylophora) vansoesti	i313_G	7393	Massive fragment 3-4 cm3
Petrosia (Strongylophora) vansoesti	i351	7394	Massive fragment 3-4 cm3
Petrosia (Strongylophora) vansoesti	i694	7395	Massive fragment 3-4 cm3
Petrosia (Petrosia) raphida	POR406	7396	Massive fragment 1-3 cm3
Petrosia (Petrosia) raphida	i178_3	7397	Massive fragment 1-3 cm3
Petrosia (Petrosia) raphida	i242	7451	Massive fragment 1-3 cm3
Petrosia (Petrosia) raphida	i254_2	7398	Massive fragment 1-3 cm3
Petrosia (Petrosia) raphida	i305	7399	Massive fragment 1-3 cm3
Petrosia (Petrosia) raphida	i312	7400	Massive fragment 1-3 cm3
Calyx cf. tufa	i75	7401	Massive fragment 3 cm3, circular pores
Calyx cf. tufa	i515	7402	Massive fragment 3 cm3, circular pores
Calyx cf. tufa	i525	7403	Massive fragment 3 cm3, circular pores
Melonanchora emphysema	i573	7404	Encrusting fragment with papillae
Polymastia polytylota	i810	7405	Circular sponge with a papillae at its upper side. 2 cm in diameter
Pseudotrachya hystrix	i303_A	7406	Small hispid sponge
Pseudotrachya hystrix	i613	7407	Small hispid sponge
Hemiasterella elongata	i149_4	7408	Erect sponge 1cm3
Hemiasterella elongata	i337	7409	Erect sponge 1cm3
Hemiasterella elongata	i531	7410	Erect sponge 1cm3
Hemiasterella elongata	POR1066	7411	Erect sponge 1cm3
Lanuginella pupa	i286_1	7412	Tubular sponge 1 cm2
Lanuginella pupa	i286_2	7413	Tubular sponge 1 cm2
Lanuginella pupa	i286_3	7414	Tubular sponge 1 cm2
Rhabderemia sp	i729_1	7415	Spicule preparation
