# Supplementary material for: Sponges of Western Mediterranean seamounts: new genera, new species and new records
Source: PeerJ. 2021 Aug 26;9:e11879. doi: 10.7717/peerj.11879 (PMC8403479; doi:10.7717/peerj.11879)
Supplement: Supplemental Information 5 [file peerj-09-11879-s005.xlsx]

## Sheet: Hoja1
i461						i727						i726				i444
LARGE OXEAS		SMALL OXEAS		STYLES		LARGE OXEAS		SMALL OXEAS		STYLES		LARGE OXEAS		SMALL OXEAS		LARGE OXEAS		SMALL OXEAS		STYLES
LENGTH	WIDTH	LENGTH	WIDTH	LENGTH	WIDTH	LENGTH	WIDTH	LENGTH	WIDTH	LENGTH	WIDTH	LENGTH	WIDTH	LENGTH	WIDTH	LENGTH	WIDTH	LENGTH	WIDTH	LENGTH	WIDTH
586182	15096	285635	8626	Need another digestion		623393	12584	292516	8983			569069	11328	287391	9145	580096	9320	256938	8138	3501974	13846
555465	10569	285317	8036			609624	13907	284402	8301			536437	12776	231877	7098	558616	10756	223904	5820	1375995	9047
544495	9945	280790	8594			603751	13696	282557	9902			509843	9428	230040	8465	551918	13789	217125	7462	1150503	7990
543488	10492	268890	6029			587347	13088	228006	9482			503052	11633	218221	6476	542514	9588	196747	6087	3501974	13846
515580	9633	264644	6535			585962	12649	220235	7656			484251	8894	214070	6672	529585	11964	195850	5486	2.00949e+06	10294.3
500322	12118	260912	8270			585323	14207	215260	7302			441659	7994	212051	8190	519953	9699	194258	4904	1150503	7990
497463	8151	254174	7247			574485	14895	211151	7447			434020	6595	208830	5707	511920	11766	179851	5784
492513	8846	253852	6433			546623	11657	210889	6439			569069	12776	204350	8870	509577	8379	179845	7077
490872	9537	253020	7339			517225	10705	210353	9460			496904	9806.86	201327	5561	502427	8583	178331	5447
487383	11546	251620	7645			502622	9642	206574	8643			434020	6595	194825	7219	501642	9137	177018	4623
482088	8167	249930	5694			500981	13550	203037	10133					189482	6558	487420	10043	176512	4906
479431	11074	245688	7929			498077	11503	201651	8572					187828	5256	482819	10762	174533	5035
476532	12254	245601	7580			490959	12519	200538	7630					185952	5989	476242	7591	173896	4850
475993	13720	244856	4663			485736	11950	200130	8496					184621	6312	470639	10701	165863	7124
471631	13595	244821	6217			480506	11488	197136	5784					184557	6781	450332	10735	158417	4312
471005	10241	239973	7519			465360	13258	192123	10208					181697	6217	421408	8065	152688	4915
467136	10491	239163	6444			458437	8690	190036	8496					179087	4804	419157	6658	152154	3922
466191	11579	238959	7415			420016	11060	188779	8118					175740	4107	415386	8208	144546	7835
455932	11665	238050	6584			623393	14895	187505	6918					174298	4745	413508	9526	143045	4199
444049	6052	237542	7252			529802	12280.4	187379	7786					173157	6106	376954	11627	139521	7423
432752	6398	234541	7428			420016	8690	184570	9876					172516	5559	360902	7149	131697	3774
413297	8184	233846	5663					183046	8729					170981	6843	339313	10163	118792	3955
411590	7136	232443	6646					182212	6479					168983	4559	319444	6257	103693	4286
385220	8725	230912	6612					182144	7486					163035	3565	580096	13789	256938	8138
382085	7848	229536	6347					181682	8369					161967	5244	467034	9585.48	171097	5537.57
376029	9381	228678	6303					180591	8020					160373	5146	319444	6257	103693	3774
357070	5722	224259	6300					180281	8020					160338	6356
355211	9464	221567	6927					179293	7063					157683	4328
327416	7146	220753	8044					178107	6603					154959	5207
586182	15096	220713	5577					176293	7104					141268	5123
460152	9819.83	218111	6527					175448	9649					131207	3718
327416	5722	217963	6971					172668	8794					130096	4668	301116	9929
		214816	7061					172125	7140					122119	5156	Intermedium stage
		214035	6781					170312	9153					107498	4817
		213588	6343					160164	6816					287391	9145
		212996	5933					157205	8164					180071	5899.03
		211552	6371					150979	6338					107498	3565
		210812	4695					145005	6603
		205891	7064					144116	6850
		196199	6399					142981	7635
		194453	5618					142178	7751
		191337	5369					292516	10208
		167255	3395					191504	8009.71
		285635	8626					142178	5784
		233249	6661.05
		167255	3395
