# Supplementary material for: Sponges of Western Mediterranean seamounts: new genera, new species and new records
Source: PeerJ. 2021 Aug 26;9:e11879. doi: 10.7717/peerj.11879 (PMC8403479; doi:10.7717/peerj.11879)
Supplement: Supplemental Information 6 [file peerj-09-11879-s006.xlsx]

## Sheet: Hoja1
i403					i420					i403 and i420
Oxyaster	Oxea I		Oxea II		Oxyaster	Oxea I		Oxea II		Oxyaster	Oxea I		Oxea II
Diameter	Length	Width	Length	Width	Diameter	Length	Width	Length	Width	Diameter	Length	Width	Length	Width
45329	1710833	24845	1087942	9386	62786	1560939	24718	862423	5901	37996.3	1.3897e+06	21182.6	745734	6916.17
45253	1683904	26459	827451	9986	56929	1556379	24678	834696	6452
44626	1571172	27467	739935	7324	53694	1537654	22326	803424	4484
43609	1565507	21759	703987	7298	49717	1520698	21372	718908	7909
41799	1554746	26536	683934	7643	48685	1518246	22787	555518	3476
40722	1527938	21414	661809	9679	48561	1512656	21073	862423	7909
40456	1518502	21981	468781	3456	47966	1491295	22257	754994	5644.4
39866	1459821	28142	827451	9986	47533	1439191	27680	555518	3476
39029	1419903	32627	680983	7564.33	46352	1432866	25716
38834	1414694	18412	468781	3456	45588	1430172	17810
38749	1393802	26617			45172	1415485	25071
38674	1389067	21813			44881	1400170	18180
38426	1379442	26423			44370	1391963	19543
37658	1342710	25210			44291	1383784	22391
37194	1272082	17372	Not included at the mean		44171	1376747	18763
37055	1013474	16173			42021	1371016	21414
37041	910182	18942			41499	1370907	18986
36386	1710833	32627			41467	1370249	18227
36032	1.41928e+06	23658.4			40454	1361008	19531
35924	910182	16173			40286	1341647	23220
34726					39995	1341106	22675
34542					39257	1332115	16139
34539					39066	1326068	18475
34271					39007	1325036	21885
34229					38800	1324515	16296
33655					38798	1320508	15543
32498					38736	1272754	19349
31752					38391	1270752	14707
30934					37707	1270633	20772
30531					37329	1270385	18560
28249					36912	1253463	11160
27998					36693	1137140	11362
27752					36397	1129769	14273
26140					36152	1560939	27680
25250					35143	1.37446e+06	19907.2
45329					35004	1129769	11160
35992.2					34907
25250					34898
					34114
					33904
					32951
					32663
					32600
					32357
					31660
					31106
					28728
					27641
					27153
					26940
					26524
					56929
					39371.7
					26524
					two actined oxyaster
