# Supplementary material for: Sponges of Western Mediterranean seamounts: new genera, new species and new records
Source: PeerJ. 2021 Aug 26;9:e11879. doi: 10.7717/peerj.11879 (PMC8403479; doi:10.7717/peerj.11879)
Supplement: Supplemental Information 7 [file peerj-09-11879-s007.xlsx]

## Sheet: Hoja1
i338_1 (=i338_A)						i338_B						i338_C
Oxeas		Styles		Trichodragmata		Styles		Oxeas		Trichodragmata		Styles		Oxeas		Trichodragmata
Length	Width	Length	Width	Length	Width	Length	Width	Length	Width	Length	Width	Length	Width	Length	Width	Length	Width
507143	15777	1160686	9188	47090	10037	1303574	12821	485040	13322	56105	7731	1265264	14406	492960	11012	51813	6620
469398	12891	1112640	8013	44313	9475	1229717	15730	481121	14973	55698	6698	1173380	11160	489826	9790	46519	9082
456551	10505	1003234	8918	44278	6494	1218770	12001	479073	11546	46806	6034	1158887	13555	440075	11382	45886	9154
450931	12739	911900	9266	43004	5665	1202277	17411	467339	8792	45579	6384	1087636	16749	438051	8573	45584	7230
449018	14274	730236	6822	42644	8977	1161304	16758	440953	16272	43430	5335	1068306	17347	395252	10918	45360	8060
446029	13333	636617	14268	41741	6955	1160965	21664	429114	10385	42835	7190	974674	14397	392938	10026	44437	5818
442781	14044	636148	14370	41448	6952	1150870	15604	428389	9930	40578	6167	754563	4134	392478	12135	41864	5671
438239	10147	610102	14192	40556	7506	1008932	15953	426262	12914	36166	7470	665980	12301	388661	16442	40803	6341
387719	15464	552380	14912	40451	6925	1001677	15768	420561	9767	35973	5640	552992	5200	384443	11256	40330	7940
387078	10324	546305	15314	40336	8702	993775	13762	420358	12704	56105	7731	517513	10408	374486	14900	40315	6416
385411	9930	498695	13662	40141	7724	945022	15260	416812	9243	44796.7	6516.56	513283	12868	368531	6972	39371	5447
385197	12551	498156	13385	40092	6433	846249	11034	405652	7888	35973	5335	505742	12985	358521	10011	38685	6603
381720	13138	493976	13818	39065	8447	693851	14979	404311	13385			480583	10165	353047	9386	38569	7443
373985	10051	487353	13516	38817	5016	419436	12180	403346	15031			439380	10822	351121	8327	38499	8460
364559	7465	444477	13641	38578	6528	394659	13459	401236	9816			437021	12940	336398	9924	37986	10228
358735	7992	403472	13954	37971	9223	320609	16253	400958	9745			421435	12884	334375	11692	37672	6284
347280	14334	399787	15522	37304	8722	248124	14123	397957	12082			410780	8494	323670	13291	37594	6193
343459	5073	394930	15808	36935	6414		26168	396005	12780			404455	11368	318458	8508	37483	6905
335488	12876	393909	15666	36920	6667		26144	379535	10496			399104	9838	316882	8374	37330	7662
332335	9851	349149	11661	36865	7484		24409	374308	12672			386910	14438	315645	10316	36887	8460
331328	13666			36727	4945		23063	373788	11964			384615	9973	308113	11117	36863	8144
330663	8561			36192	6894		19029	373465	11258			345017	11630	306766	9537	36829	7677
324924	13355			35768	6595		18929	357647	12851			332250	11940	305743	9532	36456	5505
319015	10816			33366	7820		18714	356977	13390			1265264	17347	305118	12329	36361	8823
310143	12573			33334	7955	1303574	26168	355433	8267			638251	11739.2	302376	7230	36317	10522
252319	11047			32476	6509	899989	17134	344814	10749			332250	4134	301238	8839	36267	7199
187312	5641					248124	11034	330878	13811					300951	10026	35649	6341
507143	15777	1160686	15808	47090	10037			325329	6975					300737	8110	35359	6689
374028	11422.9	613208	12794.8	39092.8	7348.62			324325	9232					295774	7175	34907	7940
187312	5073	349149	6822	32476	4945			319304	6722					290018	12017	34689	5213
								312591	8549					285891	11499	34322	8345
								294342	9864					271600	8788	33387	5161
								280765	8258					269048	7879	32482	7395
								273946	12985					267987	10240	51813	10522
								266889	12440					262465	10385	38875	7302.15
								219409	9838					261760	8559	32482	5161
								485040	16272					259046	8460
								376895	11136					257699	11279
								219409	6722					247373	7899
														492960	16442
														332449	10106
														247373	6972

## Sheet: Hoja3
i338_1 (=i338_A)						i338_B						i338_C
Oxes		Estils		Trichodragmata		Estils				Trichodragmata		Estils		Oxes		Trichodragmata
Llarg	Ample	Llarg	Ample	Llarg	Ample	Llarg	Ample	Llarg	Ample	Llarg	Ample	Llarg	Ample	Llarg	Ample	Llarg	Ample
507143	15777	1160686	9188	47090	10037
469398	12891	1112640	8013	44313	9475
456551	10505	1003234	8918	44278	6494
450931	12739	911900	9266	43004	5665
449018	14274	730236	6822	42644	8977
446029	13333	636617	14268	41741	6955
442781	14044	636148	14370	41448	6952
438239	10147	610102	14192	40556	7506
387719	15464	552380	14912	40451	6925
387078	10324	546305	15314	40336	8702
385411	9930	498695	13662	40141	7724
385197	12551	498156	13385	40092	6433
381720	13138	493976	13818	39065	8447
373985	10051	487353	13516	38817	5016
364559	7465	444477	13641	38578	6528
358735	7992	403472	13954	37971	9223
347280	14334	399787	15522	37304	8722
343459	5073	394930	15808	36935	6414
335488	12876	393909	15666	36920	6667
332335	9851	349149	11661	36865	7484
331328	13666	1303574	12821	36727	4945
330663	8561	1229717	15730	36192	6894
324924	13355	1218770	12001	35768	6595
319015	10816	1202277	17411	33366	7820
310143	12573	1161304	16758	33334	7955
252319	11047	1160965	21664	32476	6509
187312	5641	1150870	15604	56105	7731
485040	13322	1008932	15953	55698	6698
481121	14973	1001677	15768	46806	6034
479073	11546	993775	13762	45579	6384
467339	8792	945022	15260	43430	5335
440953	16272	846249	11034	42835	7190
429114	10385	693851	14979	40578	6167
428389	9930	419436	12180	36166	7470
426262	12914	394659	13459	35973	5640
420561	9767	320609	16253	51813	6620
420358	12704	248124	14123	46519	9082
416812	9243		26168	45886	9154
405652	7888		26144	45584	7230
404311	13385		24409	45360	8060
403346	15031		23063	44437	5818
401236	9816		19029	41864	5671
400958	9745		18929	40803	6341
397957	12082		18714	40330	7940
396005	12780	1265264	14406	40315	6416
379535	10496	1173380	11160	39371	5447
374308	12672	1158887	13555	38685	6603
373788	11964	1087636	16749	38569	7443
373465	11258	1068306	17347	38499	8460
357647	12851	974674	14397	37986	10228
356977	13390	754563	4134	37672	6284
355433	8267	665980	12301	37594	6193
344814	10749	552992	5200	37483	6905
330878	13811	517513	10408	37330	7662
325329	6975	513283	12868	36887	8460
324325	9232	505742	12985	36863	8144
319304	6722	480583	10165	36829	7677
312591	8549	439380	10822	36456	5505
294342	9864	437021	12940	36361	8823
280765	8258	421435	12884	36317	10522
273946	12985	410780	8494	36267	7199
266889	12440	404455	11368	35649	6341
219409	9838	399104	9838	35359	6689
492960	11012	386910	14438	34907	7940
489826	9790	384615	9973	34689	5213
440075	11382	345017	11630	34322	8345
438051	8573	332250	11940	33387	5161
395252	10918			32482	7395
392938	10026	704062	13986.8	39742	7215.94
392478	12135
388661	16442
384443	11256
374486	14900
368531	6972
358521	10011
353047	9386
351121	8327
336398	9924
334375	11692
323670	13291
318458	8508
316882	8374
315645	10316
308113	11117
306766	9537
305743	9532
305118	12329
302376	7230
301238	8839
300951	10026
300737	8110
295774	7175
290018	12017
285891	11499
271600	8788
269048	7879
267987	10240
262465	10385
261760	8559
259046	8460
257699	11279
247373	7899
359142	10818.1

## Sheet: Hoja2
						Oxeas
