# Supplementary material for: Sponges of Western Mediterranean seamounts: new genera, new species and new records
Source: PeerJ. 2021 Aug 26;9:e11879. doi: 10.7717/peerj.11879 (PMC8403479; doi:10.7717/peerj.11879)
Supplement: Supplemental Information 8 [file peerj-09-11879-s008.xlsx]

## Sheet: Hoja1
i474				i439
Large Style/Rhabdostyle		Small Rhabdostyle		Large Style/Rhabdostyle		Small Rhabdostyle
Length	Width	Length	Width	Length	Width	Length	Width
555432	17983	231716	9464	657776	15865	262167	8070
523675	15692	203540	7794	626547	12704	252973	8729
522453	16077	152790	6584	606169	20869	235186	7383
514204	14551	146809	7058	603547	15660	222016	7794
494087	16233	231716	9464	601931	17270	217903	7497
492339	16046	183714	7725	596253	17073	203366	8053
477689	19697	146809	6584	584297	16909	174807	7165
470861	12359			583945	13921	262167	8729
469653	12218			582481	15231	224060	7813
468372	18122			581390	18724	174807	7165
468277	18852			580616	15953
461102	13866			574141	16874
456020	18073			573562	15321
450662	13534			564852	17856
448923	13845			561442	13837
447672	15890			555696	17132
434765	16595			542763	17971
432018	13781			539116	15971
429584	16710			534551	17251
429200	11508			532839	12697
417564	14066			530237	16391
417094	13518			529810	14109
413358	16240			520812	11922
403678	14390			519287	11994
400091	14016			515833	15699
395610	12905			514649	10709
383672	13155			514593	8795
382372	11132			507918	16219
378780	13616			500594	17249
373295	11064			497798	14838
368080	15200			485497	13165
351494	14294			478581	12914
334702	13454			476123	15428
321019	11382			471784	13395
318340	10675			442128	11230
311629	13524			438717	12535
281755	11499			434390	15465
273509	10224			433580	8812
243803	11241			413550	14810
555432	19697			338287	10058
415816	14287.9			330340	11499
243803	10224			323315	10674
				309974	9526
				282969	8573
				657776	20869
				508970	14343.1
				282969	8573
