# Supplementary material for: Sponges of Western Mediterranean seamounts: new genera, new species and new records
Source: PeerJ. 2021 Aug 26;9:e11879. doi: 10.7717/peerj.11879 (PMC8403479; doi:10.7717/peerj.11879)
Supplement: Supplemental Information 10 [file peerj-09-11879-s010.xlsx]

## Sheet: Hoja1
i175				i52_b1
Styles		Raphides		Styles		Raphides
Length	Width	Length	Width	Length	Width	Length	Width
650537	12214	214060	2757	676346	8624	221965	1391
634105	11965	211806	1899	637236	12710	215167	2037
626156	12656	209361	2419	634159	9200	208476	2006
620485	11275	206754	1868	630041	8832	207616	2238
607946	11681	206012	1903	615430	8492	206659	2194
601048	8986	206004	1494	602307	7520	206531	2077
596123	11889	205177	2990	599631	7234	204244	2515
588140	12119	203737	2556	595766	9976	203904	1696
588138	10601	203657	2076	586420	12612	203649	1610
585746	10836	202283	3160	578067	7058	201320	2497
570300	10127	202158	1986	569748	6878	200874	2883
570293	10135	198639	3056	567596	7102	199950	2335
564537	12560	197219	2709	557860	8526	198966	1705
561977	11983	195338	1800	555773	7188	197672	2074
555467	10621	195163	1926	549534	8859	193977	1648
554863	13901	190289	1628	547510	9563	193301	2291
550441	9689	189654	1708	547280	8034	192208	1977
549853	12145	189572	1953	540023	7236	189152	1371
549265	11037	188998	1229	539045	6997	179312	2106
543371	10251	188508	1743	525448	9061	178562	1626
514337	8349	187690	1768	524366	13022	172860	2196
512770	11253	187248	1622	520639	5923	162215	2181
480476	11222	186889	1443	468113	7112	221965	2883
456939	14987	186242	2087	455849	7152	197208	2029.73
437403	9818	182937	2032	446486	7971	162215	1371
429767	9810	180537	1831	349266	12756
407163	9368	178650	2407	676346	13022
359734	12171	175214	2093	554613	8678.38
350824	10638	174341	1984	349266	5923
650537	14987	169218	2041
538559	11182.3	163497	2726
350824	8349	214060	3160
		192802	2093.35
		163497	1229
