# Supplementary material for: Sponges of Western Mediterranean seamounts: new genera, new species and new records
Source: PeerJ. 2021 Aug 26;9:e11879. doi: 10.7717/peerj.11879 (PMC8403479; doi:10.7717/peerj.11879)
Supplement: Supplemental Information 12 [file peerj-09-11879-s012.xlsx]

## Sheet: Hoja1
i303					i613
Anisoxeas		Raphides (Microxeas)		OBS	Anisoxeas		Raphides (Microxeas)		OBS
Length	Width	Length	Width		Length	Width	Length	Width
3358247	41965	217321	4979		3401708	40994	270058	4317
2931799	39490	213161	5846		3011380	29374	256602	4586
2740048	39690	201226	4829		2912517	43670	239124	5324
2732490	35132	198944	4090		2733099	34993	237695	5200
2662914	42286	197571	5506		2730100	36714	237510	4708
2491322	36925	196169	4634		2526241	38419	234516	5368
2148031	19435	195559	5380		2467921	35611	229473	4134
2056698	36027	192136	4553		2375347	41334	222322	5718
1950540	30371	191926	4146		2364244	44007	204947	4870
1870732	33570	190254	4121		2285565	37707	204518	4566
1663728	15902	185344	4737		2163697	44997	204315	5230
1354933	15421	183394	4616		1626855	34267	203183	4948
1338182	17679	182952	5455		1412496	18118	201747	4473
1258844	26331	182664	3922		1375792	22847	201109	5378
1191589	27813	181848	4019		1370065	20327	198460	4539
1166436	18414	181765	4713		1361893	21274	198237	5191
1067234	19100	181692	4253		1087535	20181	194864	5551
1021059	19270	177727	4305		1701177	28701	193189	4870
1020159	14116	177212	4915		3401708	44997	192900	4303
970246	21482	176532	4915		2.16154e+06	32974.2	192642	5703
925606	13235	175526	5906		1087535	18118	189966	5688
901570	14542	172382	4829				189723	4380
878278	12638	170070	5750				188690	5417
834243	10421	166583	6284				188516	4461
3358247	42286	161553	4572				185849	5873
1.68896e+06	25052.3	155630	5080				185282	4704
834243	10421	217321	6284		767870	19453	183889	4726
		184890	4859.81				179300	4850
		155630	3922				177214	5959
							176029	4765
							173257	5834
							152270	3003
							270058	5959
526932	9998						202731	4957.41
IMMATURE ANISOXEA							152270	3003
